## Erratum

Please note that in the article by *H. Overgaard Nielsen and M. Lorentzen* in Vol. 36, No. 5 (pp. 335–340), 1981, figures 3 and 4 have erroneously been exchanged.

## Announcement

### Rules for the Stiftung C.-E. Alken Prize

(1) We would like to announce the establishment of an endowment fund under the name of 'Stiftung C.-E. Alken', for the purpose of furthering clinical work and research in the field of Urology by presenting an annual award of SFr. 10,000.– for outstanding scientific endeavours.

(2) The award will be for an unpublished work in the field of Urology. An award certificate will also be presented. The prize money may be divided among several contributors.

(3) The papers may be written in either German or English, and three copies have to be submitted by

October 31, 1982 to Stiftungsrat C.-E.-Alken-Stiftung, Advokaturbüro Dr. F. Kellerhals, Bundesplatz 4, CH-3011 Bern (Switzerland).

(4) Each submission must be affixed with a code word and must not bear the author's name. But, in addition, a sealed envelope labelled with the code word is to be included, containing on a separate sheet of paper the author's name and professional standing, together with the code word.

(5) The adjudicators for the award will be the Board of Directors of the Endowment Fund, and their decision will be final.
